# Supplementary material
Source: Springer Nature journal article supplement (https://www.springermedizin.de/resource/supplementary/12882_2012_366_MOESM4_ESM.pdf/9453486)
Supplement: MOESM4 [file 9453486]

**Supplementary Table S4. Subcategories of healthcare costs per month by baseline iPTH, Hungary, Italy, Portugal, Spain, and Turkey.**

|                                                                                                           | Baseline iPTH*, pg/mL |               |               |               |               |               | Total         |
|-----------------------------------------------------------------------------------------------------------|-----------------------|---------------|---------------|---------------|---------------|---------------|---------------|
|                                                                                                           | < 75                  | ≥ 75 – < 150  | ≥ 150 – ≤ 300 | > 300 – ≤ 600 | > 600         | > 800         |               |
| N patients                                                                                                | 1054                  | 1145          | 1394          | 1140          | 653           | 405           | 5386          |
| Cost of CVD-related hospitalisations per month (including patients with zero costs), 2006 €               |                       |               |               |               |               |               |               |
| Mean                                                                                                      | 17.63                 | 17.79         | 19.08         | 14.87         | 14.06         | 15.66         | 17.02         |
| SD                                                                                                        | 178.31                | 287.65        | 249.22        | 133.97        | 109.49        | 128.88        | 212.40        |
| Median                                                                                                    | 0.00                  | 0.00          | 0.00          | 0.00          | 0.00          | 0.00          | 0.00          |
| Q1, Q3                                                                                                    | 0.00, 0.00            | 0.00, 0.00    | 0.00, 0.00    | 0.00, 0.00    | 0.00, 0.00    | 0.00, 0.00    | 0.00, 0.00    |
| Min, Max                                                                                                  | 0.00, 3879.20         | 0.00, 9533.54 | 0.00, 7501.80 | 0.00, 3790.69 | 0.00, 1879.98 | 0.00, 1879.98 | 0.00, 9533.54 |
| Patients with CVD-related hospitalisation cost per month > €0, n (%)                                      | 26 (2)                | 37 (3)        | 44 (3)        | 51 (4)        | 22 (3)        | 13 (3)        | 180 (3)       |
| Cost of fracture-related hospitalisations per month (including patients with zero costs), 2006 €          |                       |               |               |               |               |               |               |
| Mean                                                                                                      | 3.90                  | 4.24          | 1.75          | 2.71          | 4.24          | 3.53          | 3.20          |
| SD                                                                                                        | 44.95                 | 62.95         | 29.81         | 28.63         | 47.48         | 49.14         | 43.75         |
| Median                                                                                                    | 0.00                  | 0.00          | 0.00          | 0.00          | 0.00          | 0.00          | 0.00          |
| Q1, Q3                                                                                                    | 0.00, 0.00            | 0.00, 0.00    | 0.00, 0.00    | 0.00, 0.00    | 0.00, 0.00    | 0.00, 0.00    | 0.00, 0.00    |
| Min, Max                                                                                                  | 0.00, 857.85          | 0.00, 1762.45 | 0.00, 764.75  | 0.00, 549.49  | 0.00, 941.99  | 0.00, 941.99  | 0.00, 1762.45 |
| Patients with fracture-related hospitalisation cost per month > €0, n (%)                                 | 11 (1)                | 10 (1)        | 7 (1)         | 12 (1)        | 8 (1)         | 4 (1)         | 48 (1)        |
| Cost of parathyroidectomy-related hospitalisations per month (including patients with zero costs), 2006 € |                       |               |               |               |               |               |               |
| Mean                                                                                                      | 1.87                  | 1.18          | 0.67          | 0.29          | 7.21          | 10.30         | 1.73          |
| SD                                                                                                        | 38.31                 | 27.36         | 25.01         | 7.02          | 54.86         | 67.80         | 31.42         |
| Median                                                                                                    | 0.00                  | 0.00          | 0.00          | 0.00          | 0.00          | 0.00          | 0.00          |
| Q1, Q3                                                                                                    | 0.00, 0.00            | 0.00, 0.00    | 0.00, 0.00    | 0.00, 0.00    | 0.00, 0.00    | 0.00, 0.00    | 0.00, 0.00    |
| Min, Max                                                                                                  | 0.00, 1133.29         | 0.00, 858.30  | 0.00, 933.83  | 0.00, 189.19  | 0.00, 1133.29 | 0.00, 1133.29 | 0.00, 1133.29 |
| Patients with parathyroidectomy-related hospitalisation cost per month > €0, n (%)                        | 4 (0)                 | 3 (0)         | 1 (0)         | 2 (0)         | 20 (3)        | 17 (4)        | 30 (1)        |

|                                                                                     | Baseline iPTH*, pg/mL |              |               |               |              |              | Total        |
|-------------------------------------------------------------------------------------|-----------------------|--------------|---------------|---------------|--------------|--------------|--------------|
|                                                                                     | < 75                  | ≥ 75 – < 150 | ≥ 150 – ≤ 300 | > 300 – ≤ 600 | > 600        | > 800        |              |
| Cost of CVD medications per month (including patients with zero costs), 2006 €      |                       |              |               |               |              |              |              |
| Mean                                                                                | 13.10                 | 14.39        | 15.63         | 16.09         | 14.71        | 13.71        | 14.86        |
| SD                                                                                  | 23.02                 | 23.70        | 23.46         | 23.12         | 22.10        | 22.44        | 23.21        |
| Median                                                                              | 3.51                  | 5.34         | 5.52          | 5.51          | 5.32         | 4.77         | 5.00         |
| Q1, Q3                                                                              | 0.00, 15.33           | 0.00, 18.19  | 0.03, 20.92   | 0.00, 23.07   | 0.03, 19.41  | 0.00, 16.84  | 0.00, 19.41  |
| Min, Max                                                                            | 0.00, 217.84          | 0.00, 331.96 | 0.00, 197.79  | 0.00, 175.38  | 0.00, 211.68 | 0.00, 211.68 | 0.00, 331.96 |
| Patients with CVD medication cost per month > €0, n (%)                             | 722 (69)              | 844 (74)     | 1049 (75)     | 844 (74)      | 490 (75)     | 300 (74)     | 3949 (73)    |
| Cost of SHPT medications per month (including patients with zero costs), 2006 €     |                       |              |               |               |              |              |              |
| Mean                                                                                | 19.83                 | 26.49        | 32.43         | 46.96         | 69.11        | 70.48        | 36.22        |
| SD                                                                                  | 35.96                 | 44.92        | 54.89         | 67.07         | 96.20        | 100.49       | 61.36        |
| Median                                                                              | 5.38                  | 6.42         | 8.77          | 18.42         | 36.96        | 36.96        | 9.39         |
| Q1, Q3                                                                              | 0.84, 19.58           | 1.67, 32.93  | 2.23, 39.38   | 3.23, 68.15   | 5.42, 83.99  | 5.54, 85.18  | 2.26, 44.95  |
| Min, Max                                                                            | 0.00, 295.38          | 0.00, 329.59 | 0.00, 474.57  | 0.00, 461.33  | 0.00, 662.47 | 0.00, 662.47 | 0.00, 662.47 |
| Patients with SHPT medication cost per month > €0, n (%)                            | 827 (78)              | 942 (82)     | 1181 (85)     | 978 (86)      | 575 (88)     | 357 (88)     | 4503 (84)    |
| Cost of diabetes medications per month (including patients with zero costs), 2006 € |                       |              |               |               |              |              |              |
| Mean                                                                                | 4.19                  | 2.93         | 3.91          | 1.54          | 0.63         | 0.45         | 2.86         |
| SD                                                                                  | 24.09                 | 15.02        | 28.79         | 13.79         | 3.31         | 2.36         | 20.47        |
| Median                                                                              | 0.00                  | 0.00         | 0.00          | 0.00          | 0.00         | 0.00         | 0.00         |
| Q1, Q3                                                                              | 0.00, 0.00            | 0.00, 0.00   | 0.00, 0.00    | 0.00, 0.00    | 0.00, 0.00   | 0.00, 0.00   | 0.00, 0.00   |
| Min, Max                                                                            | 0.00, 275.14          | 0.00, 199.84 | 0.00, 554.20  | 0.00, 352.22  | 0.00, 41.31  | 0.00, 30.50  | 0.00, 554.20 |
| Patients with diabetes medication cost per month > €0, n (%)                        | 157 (15)              | 186 (16)     | 195 (14)      | 117 (10)      | 50 (8)       | 26 (6)       | 705 (13)     |

CVD, cardiovascular disease; iPTH, intact parathyroid hormone; SHPT, secondary hyperparathyroidism

\*Mean iPTH during 3-month baseline period
